# Supplementary material for: Antibacterial Activity of Peptide Derivatives of Phosphinothricin against Multidrug-Resistant Klebsiella pneumoniae
Source: MDPI journal article supplement (doi:10.3390/molecules28031234), 2023-01-27
Supplement: s1 [file s1]

# Antibacterial Activity of Peptide Derivatives of Phosphinothricin against Multidrug-Resistant *Klebsiella pneumoniae*

Marija V. Demiankova <sup>1,†</sup>, Fabio Giovannercole <sup>2,†,‡</sup>, Maxim A. Khomutov <sup>3</sup>, Arthur I. Salikhov <sup>3</sup>, Laura Onillon <sup>2,§</sup>, Vladimir T. Valuev-Elliston <sup>3</sup>, Byazilya F. Vasilieva <sup>1</sup>, Elena N. Khurs <sup>3</sup>, Nina I. Gabrielyan <sup>4</sup>, Sergey N. Kochetkov <sup>3</sup>, Olga V. Efremenkova <sup>1,\*</sup>, Daniela De Biase <sup>2,\*</sup> and Alex R. Khomutov <sup>3,\*</sup>

<sup>1</sup> Gause Institute of New Antibiotics, Bol'shaya Pirogovskaya 11, 119021 Moscow, Russia; mary\_bunny@mail.ru (M.V.D.); bfvas@yandex.ru (B.F.V.)

<sup>2</sup> Department of Medico-Surgical Sciences and Biotechnologies, Sapienza University of Rome, Corso della Repubblica 79, I-04100 Latina, Italy; fabio.giovannercole@gmail.com (F.G.); laura.onillon@ifremer.fr (L.O.)

<sup>3</sup> Engelhardt Institute of Molecular Biology, Russian Academy of Sciences, Vavilov Street 32, 119991 Moscow, Russia; makhomutov@mail.ru (M.A.K.); asalihov93@gmail.com (A.I.S.); gansfaust@mail.ru (V.T.V.-E.); enkhurs@yandex.ru (E.N.K.); kochet@eimb.ru (S.N.K.)

<sup>4</sup> Academician V.I. Shumakov Federal Research Centre of Transplantology and Artificial Organs, Moscow 123182, Russia; labgso@mail.ru

\* Correspondence: ovefr@yandex.ru (O.V.E.); daniela.debiase@uniroma1.it (D.D.B.); alexkhom@eimb.ru (A.R.K.)

† These authors contributed equally to this work.

‡ Present address: Département de Biologie, Université de Namur, Rue de Bruxelles 61, 5000 Namur, Belgium

§ Present address: IHPE UMR 5244, Université de Montpellier, Place Eugène Bataillon CC 80, F-34095 Montpellier CEDEX 5, France

**Keywords:** multidrug-resistant bacteria; *Klebsiella pneumoniae*; *Escherichia coli*; Glutamine synthetase; phosphinothricin; Bialaphos

---

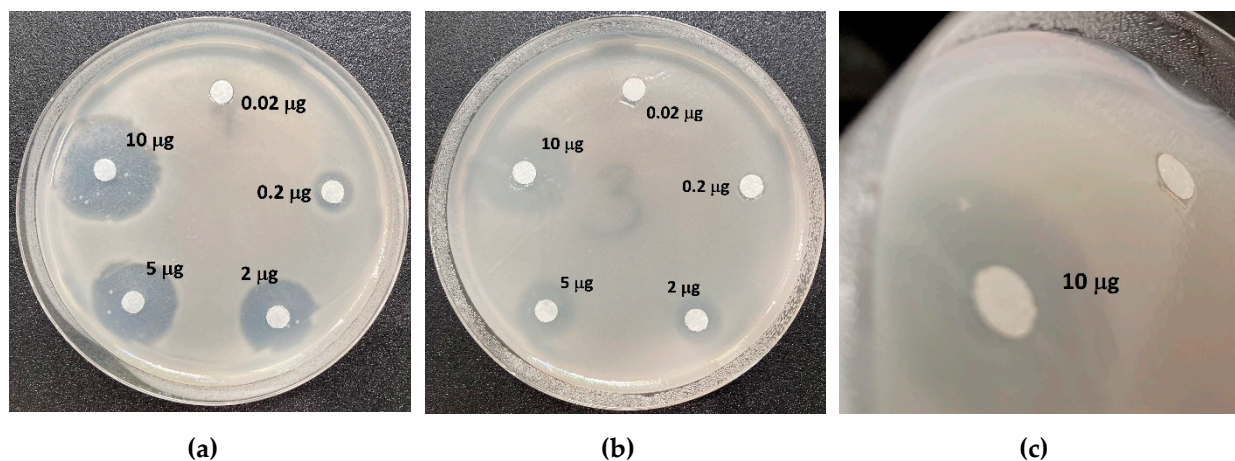

**Figure S1.** Inhibition of the growth of reference strain *Klebsiella pneumoniae* ATCC 13883 with Bialaphos and the reverse of the effect with Gln. **(a)** – dose-dependent effect of Bialaphos, µg per disk; **(b)** – same as (a), but with the agar containing 0.5 mM Gln; **(c)** – zoomed (b) taken with angle.

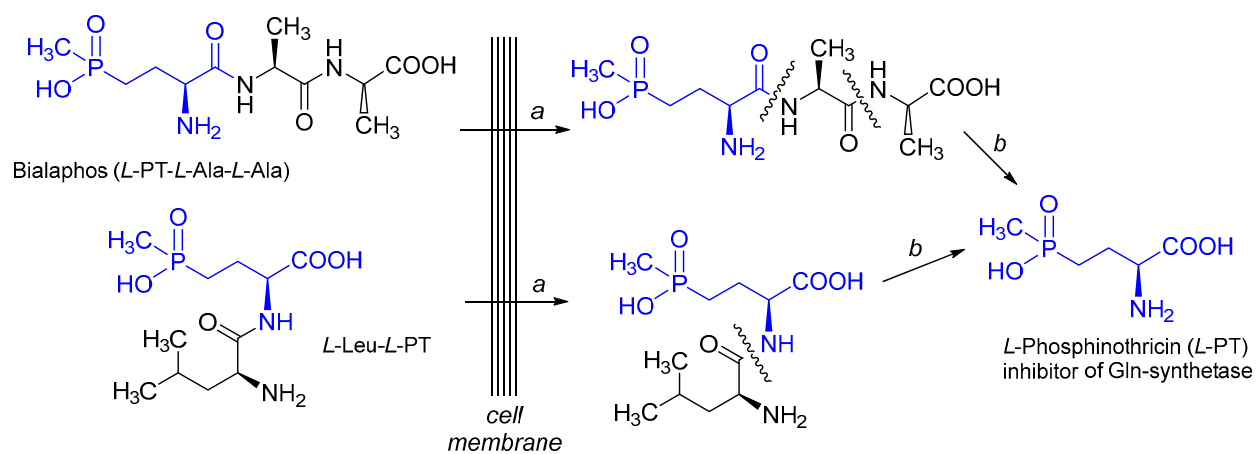

**Figure S2.** Proposed mechanism of antibacterial activity of Bialaphos and L-Leu-L-PT. **a**– peptidyl permeases; **b**– peptidases.

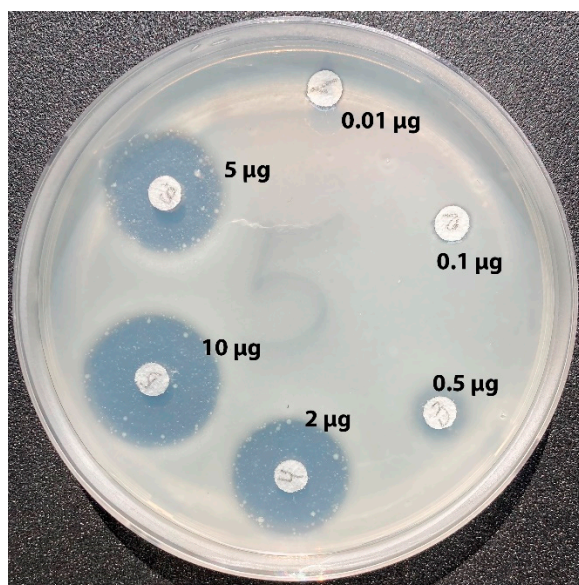

(a)

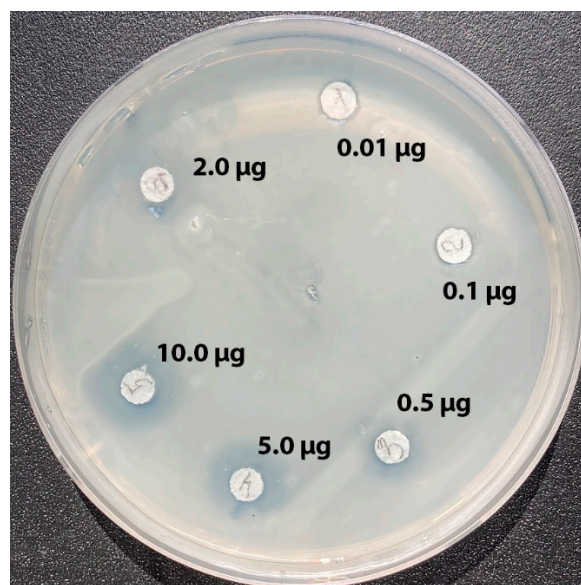

(b)

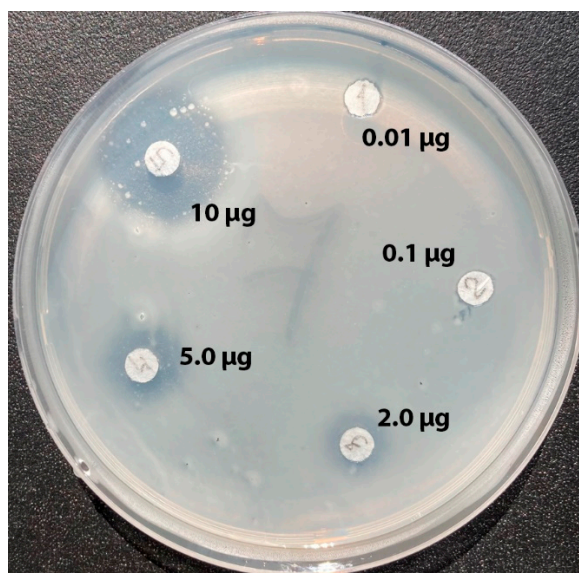

(c)

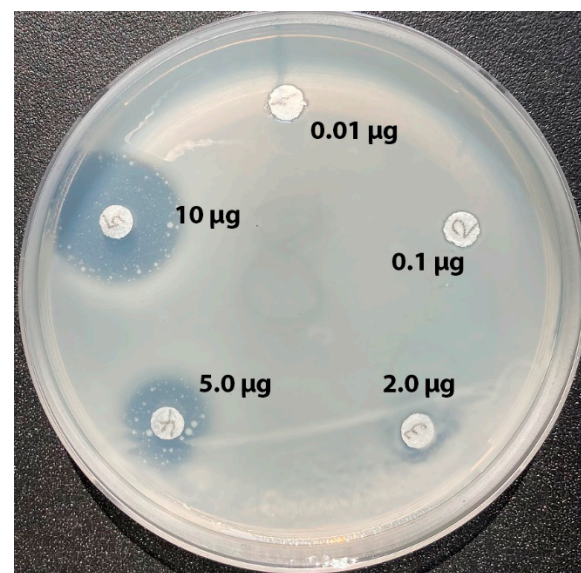

(d)

**Figure S3.** Glutamine reverses Bialaphos-induced inhibition of the growth of reference strain of *Klebsiella pneumoniae* ATCC 13883 dose-dependently. Figures at dishes show the amount of bialaphos applied on the disk. **(A)** – no Gln in agar; **(B)** – agar containing 0.5 mM Gln; **(C)** – agar containing 0.1 mM Gln; **(D)** – agar containing 0.02 mM Gln.



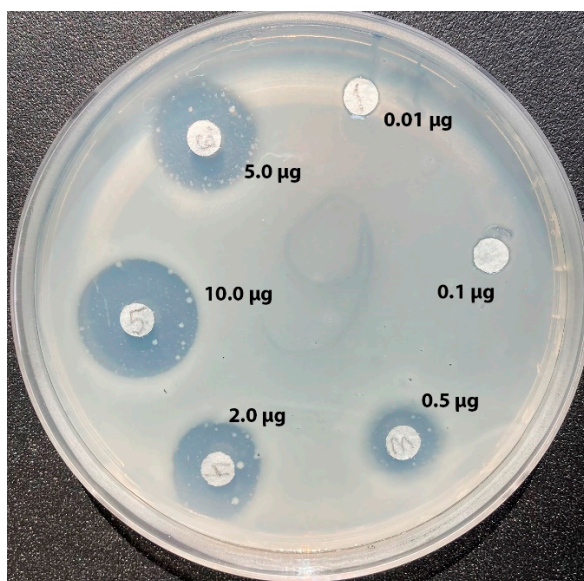

(a)

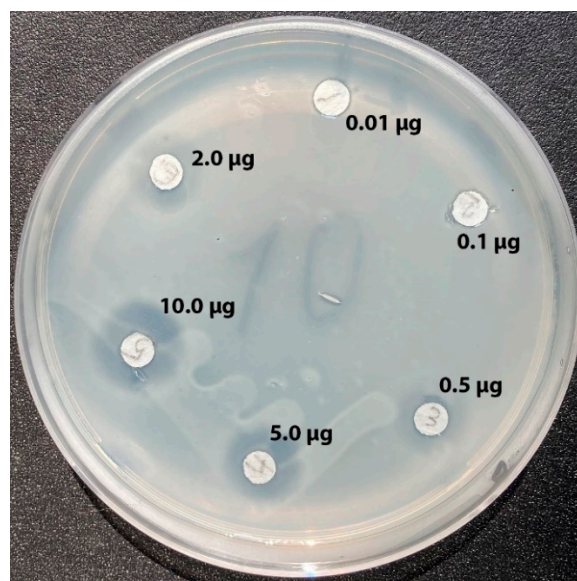

(b)

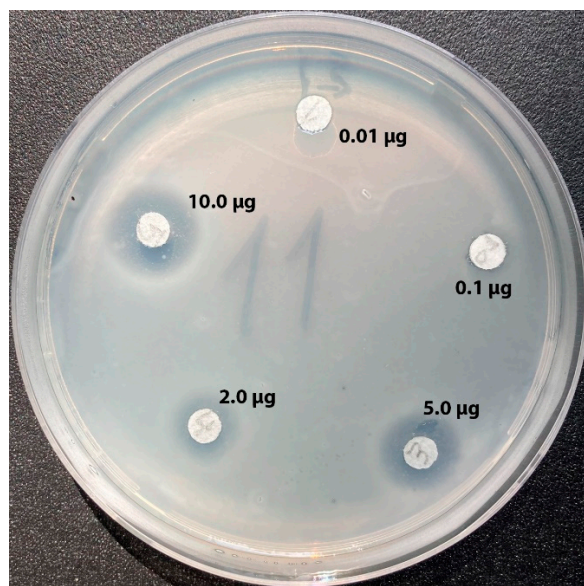

(c)

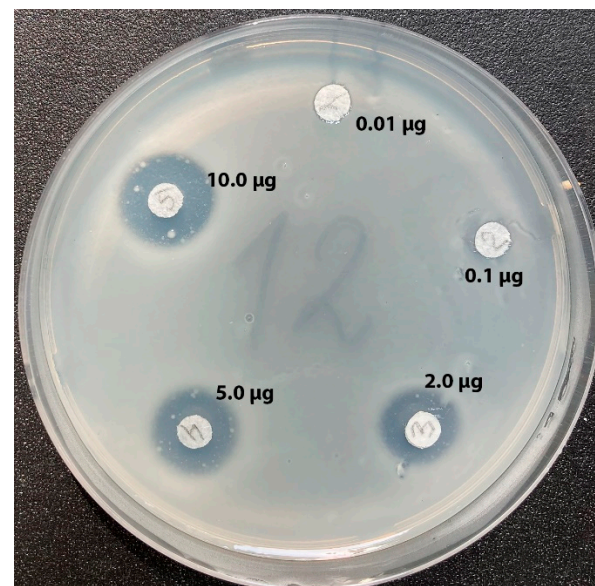

(d)

**Figure S4.** Glutamine reverses *L*-Leu-*L*-PT-induced inhibition of the growth of reference strain of *Klebsiella pneumoniae* ATCC 13883 doze-dependently. Figures at dishes show the amount of *L*-Leu-*L*-PT applied on the disk. **(A)** – no Gln in agar; **(B)** – agar containing 0.5 mM Gln; **(C)** – agar containing 0.1 mM Gln; **(D)** – agar containing 0.02 mM Gln.

MDR clinical isolate of *Klebsiella pneumoniae* (strain 1161)

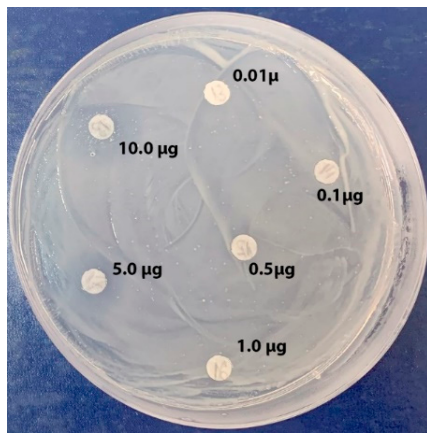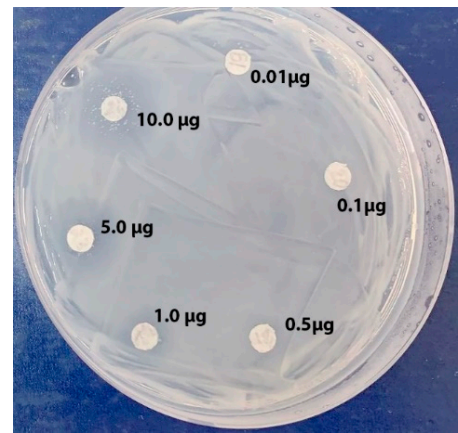

MDR clinical isolate of *Klebsiella pneumoniae* (strain 1158)

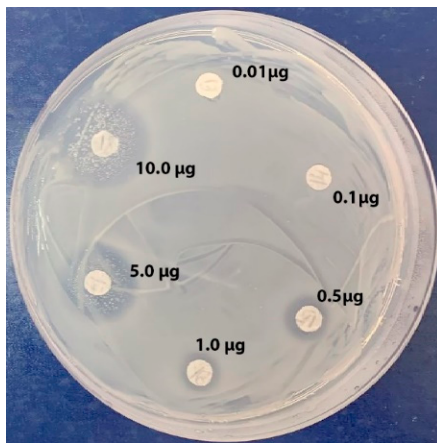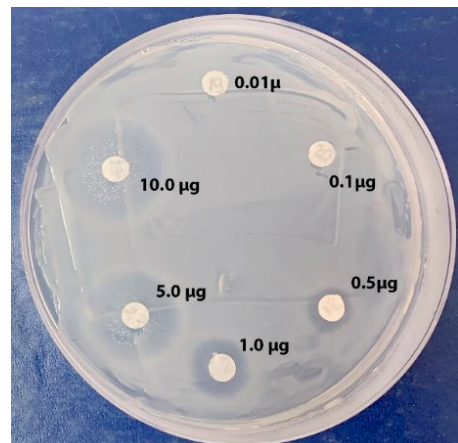

MDR clinical isolate of *Klebsiella pneumoniae* (strain 1133)

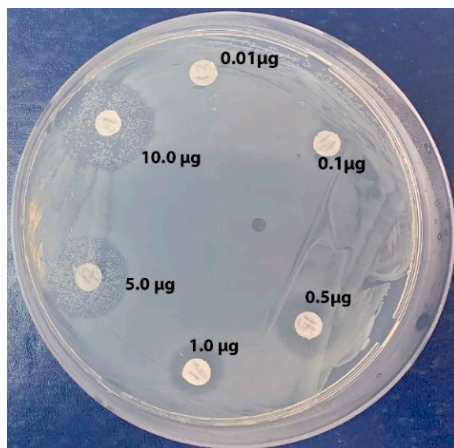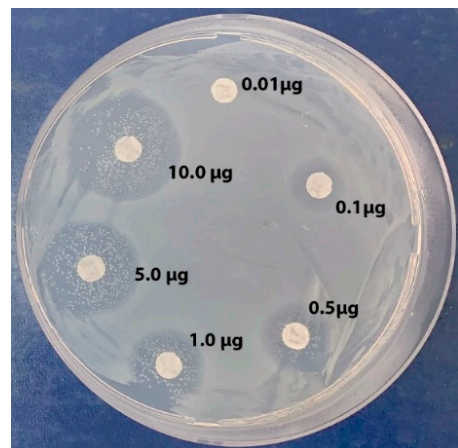

**Figure S5.** Doze-dependent inhibition of the growth of multi-drug resistant clinical isolates of *Klebsiella pneumoniae* with Bialaphos (left,  $\mu$ g of tripeptide per disk) and L-Leu-L-PT (right,  $\mu$ g of dipeptide per disk).



**Table S1.** Inhibition of the growth of clinical isolates of multi-drug resistant *Klebsiella pneumoniae* (marked **light ocher**) and reference strain ATCC 13883 (marked **Mauve**) with Bialaphos, *L*-Leu-*L*-PT and antibiotics of different classes.

|     | Antibiotics and PT derivatives         | Strain 1161                                | Strain 1158 | Strain 1133 | ATCC 13883 |
|-----|----------------------------------------|--------------------------------------------|-------------|-------------|------------|
|     |                                        | Diameter of growth zones, mm <sup>*)</sup> |             |             |            |
| 1.  | Amikacin, 30 µg/disk                   | 0/0                                        | 0/0         | 11/9        | 23/23      |
| 2.  | Ampicillin, 10 µg/disk                 | 0/0                                        | 0/0         | 0/0         | 0/0        |
| 3.  | Gentamicin, 10 µg/disk                 | 0/0                                        | 0/0         | 19/16       | 23/24      |
| 4.  | Ciprofloxacin, 5 µg/disk               | 0/0                                        | 0/0         | 0/0         | 33/35      |
| 5.  | Cefazolin, 30 µg/disk                  | 0/0                                        | 0/0         | 0/0         | 22/24      |
| 6.  | Tetracycline, 30 µg/disk               | 22/22                                      | 0/0         | 0/0         | 19/20      |
| 13. | Bialaphos, 5 µg/disk                   | 16/15                                      | 16/16       | 17/16       | 18/22      |
| 14. | <i>L</i> -Leu- <i>L</i> -PT, 5 µg/disk | 18/17                                      | 18/17       | 18/20       | 18/18      |
| 7.  | Cefotaxime, 30 µg/disk                 | 0/0                                        | 0/0         | 0/0         | 40/42      |
| 8.  | Levofloxacin, 5 µg/disk                | 0/0                                        | 0/0         | 0/0         | 32/34      |
| 9.  | Polymyxin B, 300 IU/disk               | 12/10                                      | 13/14       | 14/14       | 16/18      |
| 10. | Tobramycin, 10 µg/disk                 | 0/0                                        | 0/0         | 0/0         | 21/20      |
| 11. | Trimethoprim, 5 µg/disk                | 0/0                                        | 0/0         | 0/0         | 18/21      |
| 12. | Ampicillin/Sulbactam, 10/10 µg/disk    | 0/0                                        | 0/0         | 0/0         | 13/15      |
| 13. | Bialaphos, 5 µg/disk                   | 15/14                                      | 17/19       | 17/18       | 21/23      |
| 14. | <i>L</i> -Leu- <i>L</i> -PT, 5 µg/disk | 17/17                                      | 16/19       | 21/21       | 19/22      |

<sup>\*)</sup> Dish 1/dish 2 (one of two dishes is depicted at Figure 3, for ATCC 13882, and at Figure 4 for multi-drug resistant strains 1161, 1158 and 1133).

<sup>\*)</sup> **Light ocher** section of the Table is illustrated by Figure 4; **mauve** section – by Figure 3.

**Table S2.** Multi-drug resistant clinical isolates of *Klebsiella pneumoniae*. R – resistant; **S** – sensitive; Antibiotics verified in this study are in the left column and are in blue.

| Antibiotic                    | <i>K.pneumoniae</i> strain |          |          | Antibiotic                  | <i>K.pneumoniae</i> strain |          |      |
|-------------------------------|----------------------------|----------|----------|-----------------------------|----------------------------|----------|------|
|                               | 1161                       | 1158     | 1133     |                             | 1161                       | 1158     | 1133 |
| Amikacin                      | R                          | R        | R        | Amoxicillin/clavulanic acid | R                          | R        | R    |
| Ampicillin/Sulbactam          | R                          | R        | R        | Aztreonam                   | R                          | R        | R    |
| Ampicillin                    | R                          | R        | R        | Cefepime                    | R                          | R        | R    |
| Cefazolin                     | R                          | R        | R        | Cefoxitin                   | R                          | R        | R    |
| Cefotaxime                    | R                          | R        | R        | Ceftazidime                 | R                          | R        | R    |
| Ciprofloxacin                 | R                          | R        | R        | Ceftriaxone                 | R                          | R        | R    |
| Gentamicin                    | R                          | R        | <b>S</b> | Cefuroxime                  | R                          | R        | R    |
| Levofloxacin                  | R                          | R        | R        | Ertapenem                   | R                          | R        | R    |
| Tetracycline                  | <b>S</b>                   | R        | R        | Imipenem                    | R                          | R        | R    |
| Tobramycin                    | R                          | R        | R        | Meropenem                   | R                          | R        | R    |
| Trimethoprim/sulfamethoxazole | R                          | R        | R        | Piperacillin                | R                          | R        | R    |
| Polymyxin B                   | <b>S</b>                   | <b>S</b> | <b>S</b> | Piperacillin/tazobactam     | R                          | R        | R    |
|                               |                            |          |          | Tigecycline                 | <b>S</b>                   | <b>S</b> | R    |



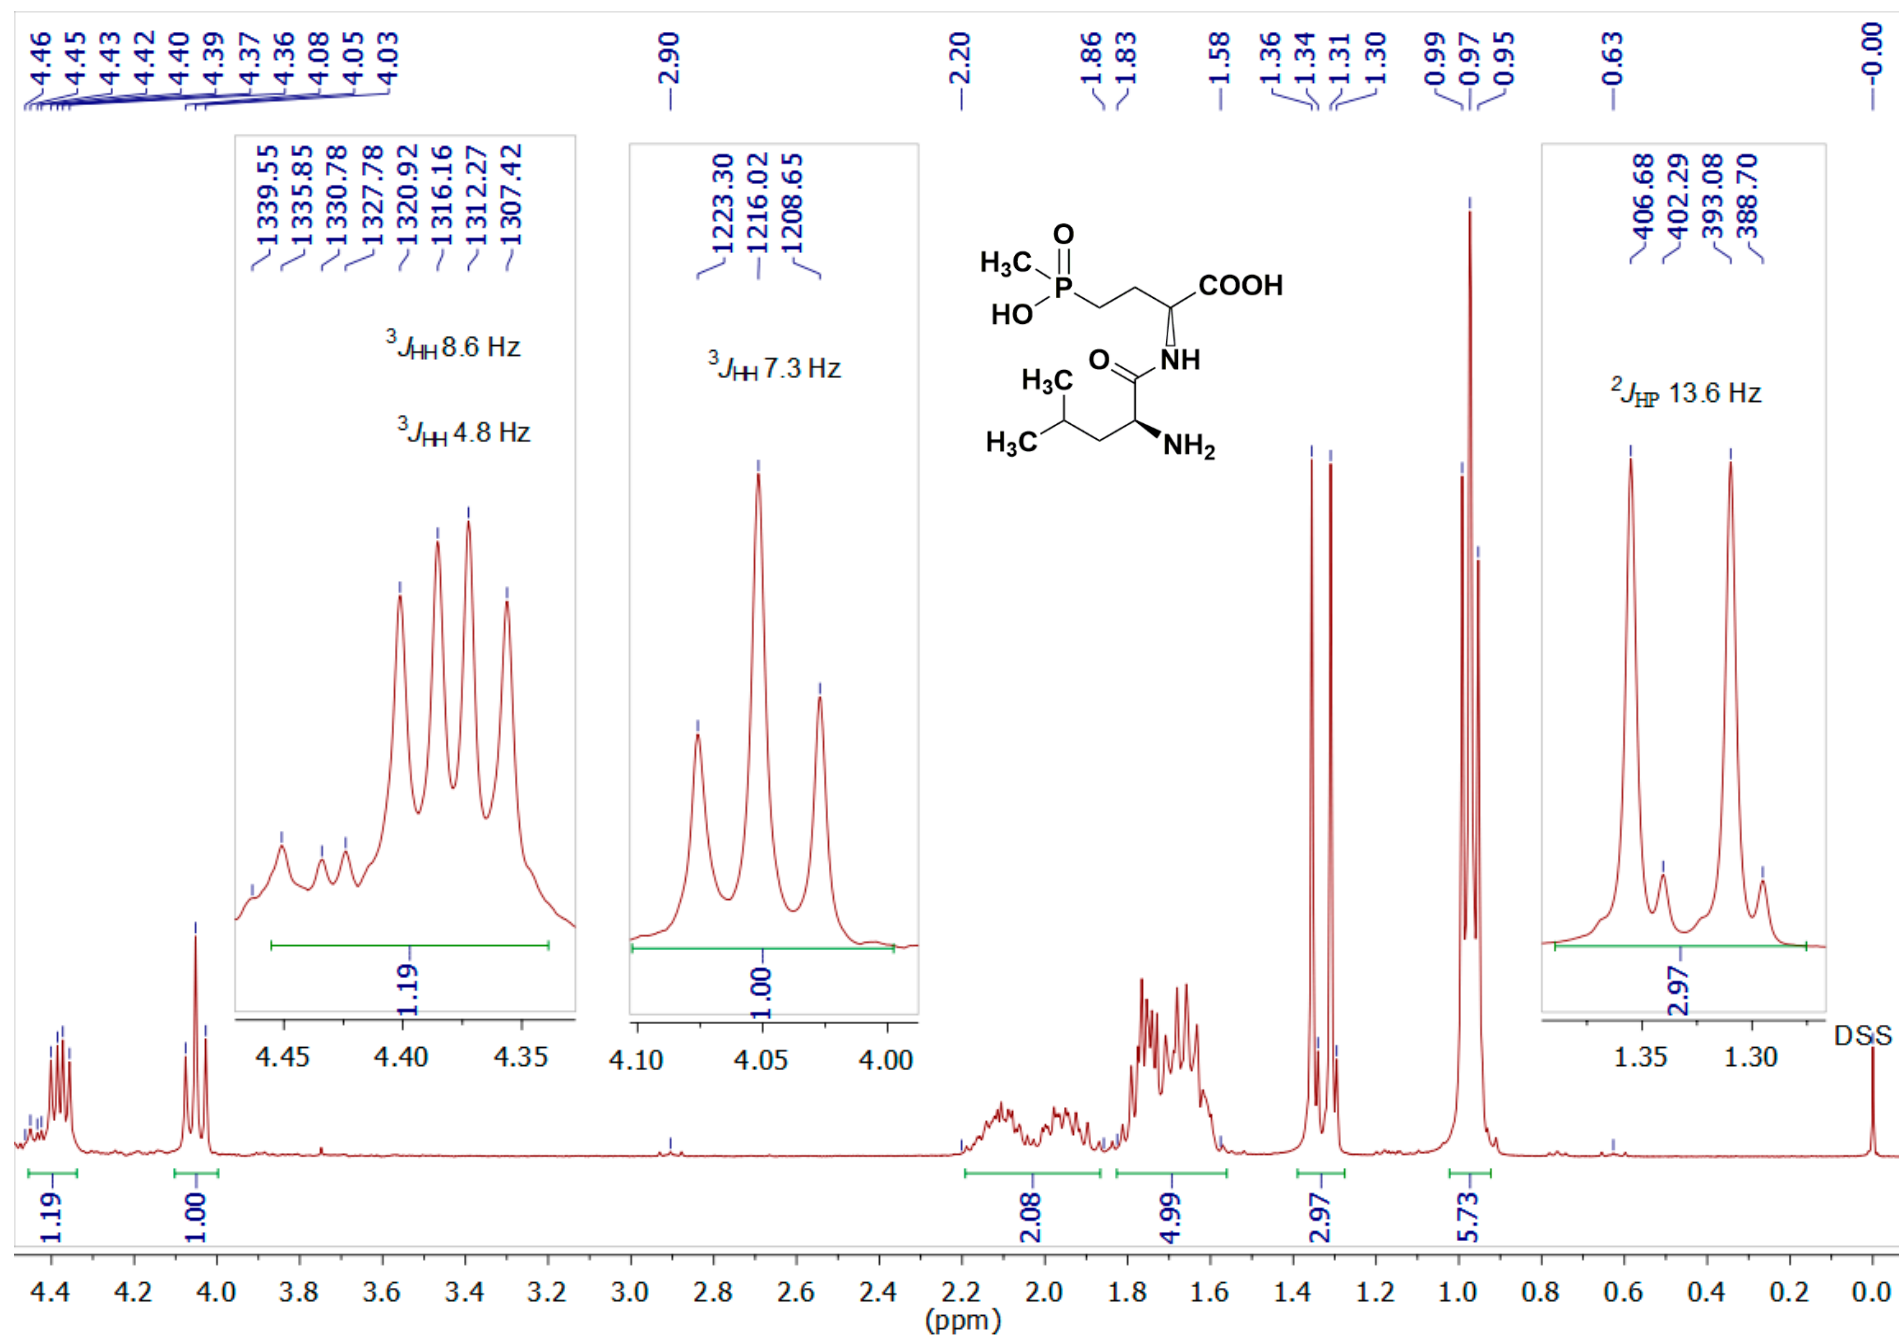

**Figure S6.**  $^1\text{H}$ -NMR spectrum of *L*-Leu-*D*-PT with about 10% of *L,L*-diastereomer (fraction n. 7).

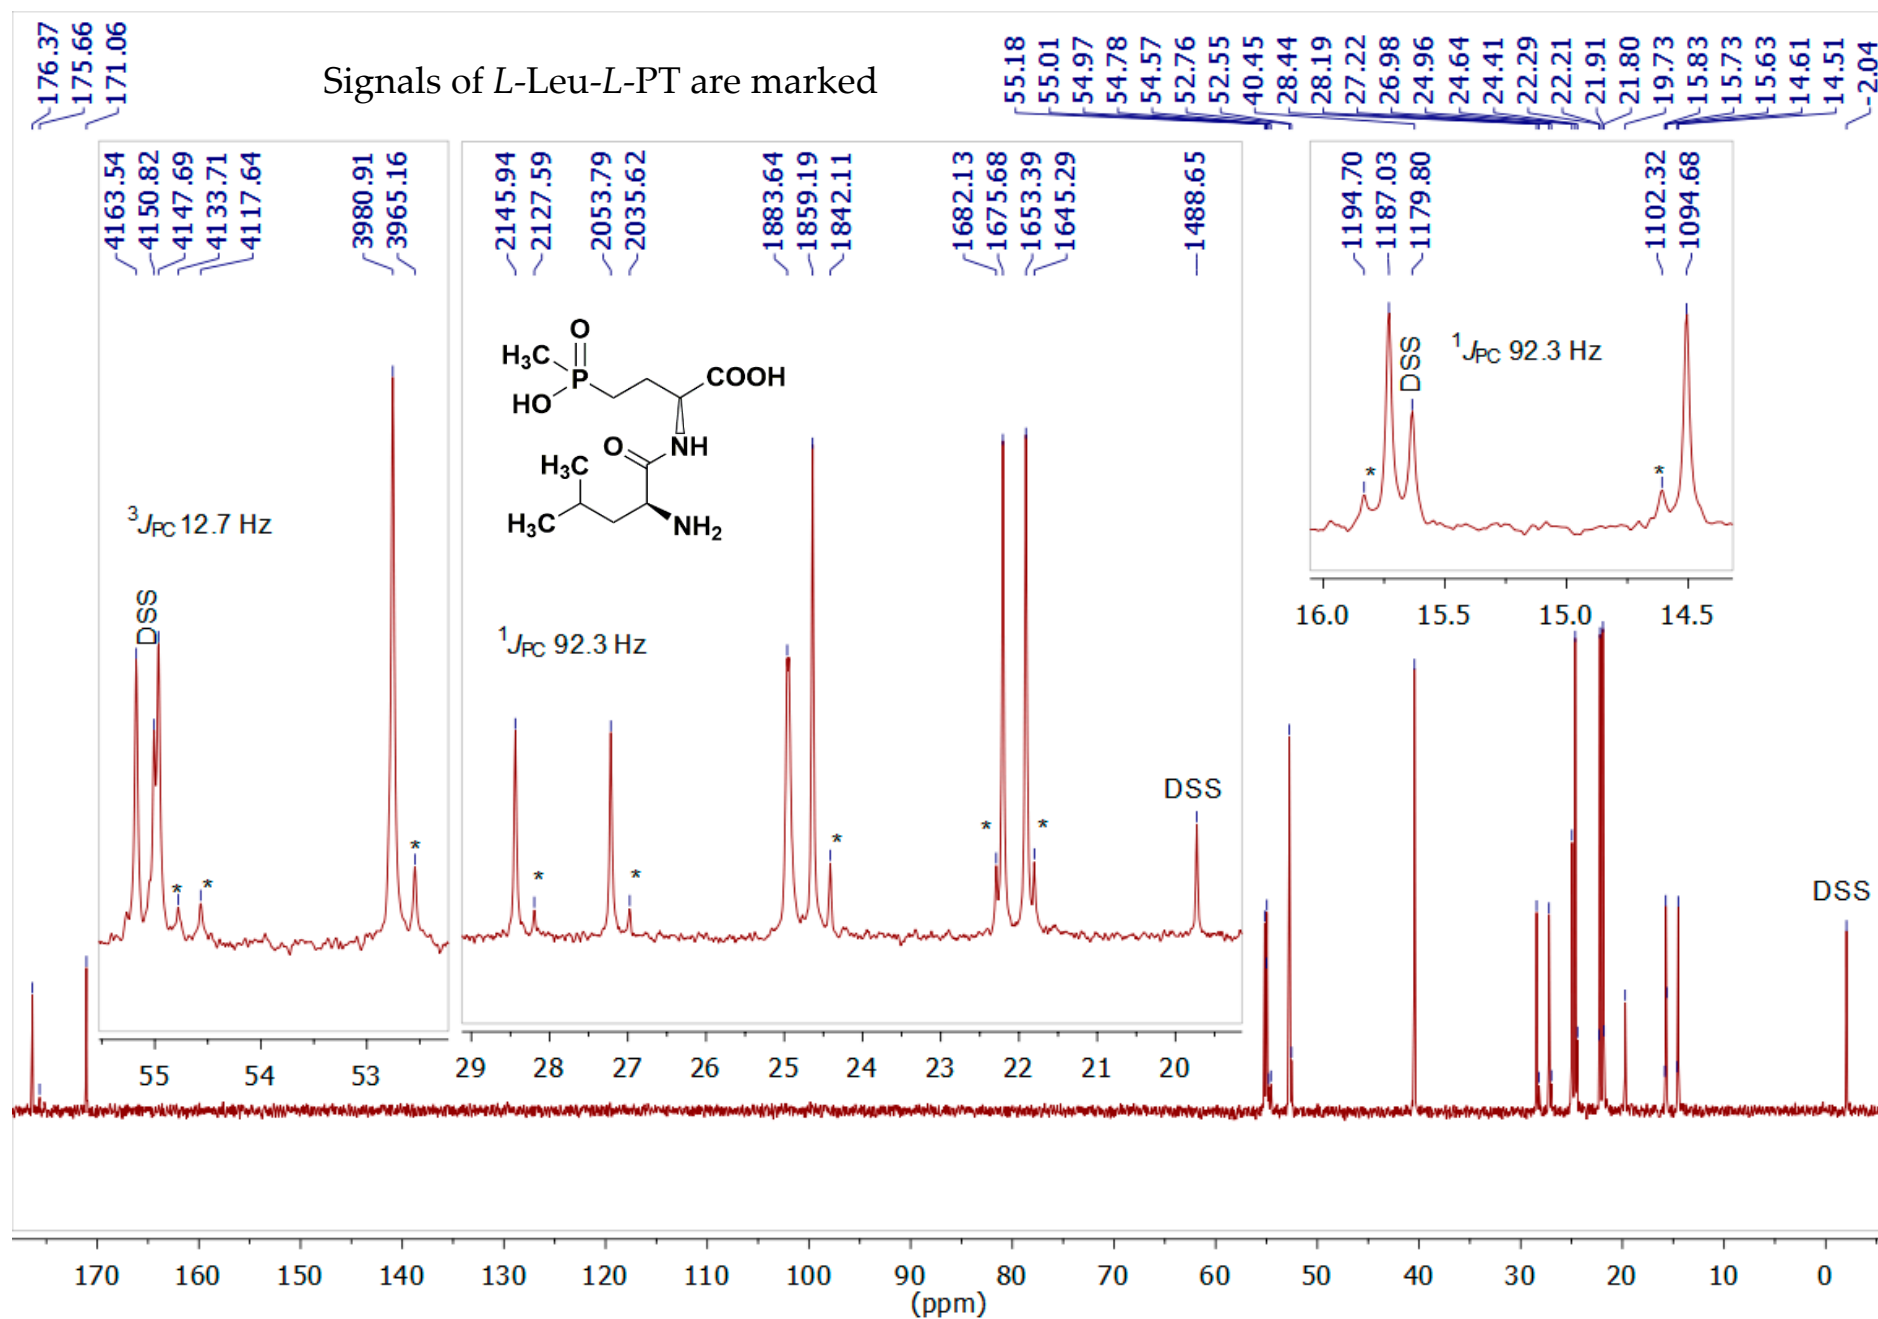

Figure S7.  $^{13}\text{C}$ -NMR spectrum of *L*-Leu-*D*-PT with about 10% of *L,L*-diastereomer (fraction n. 7).

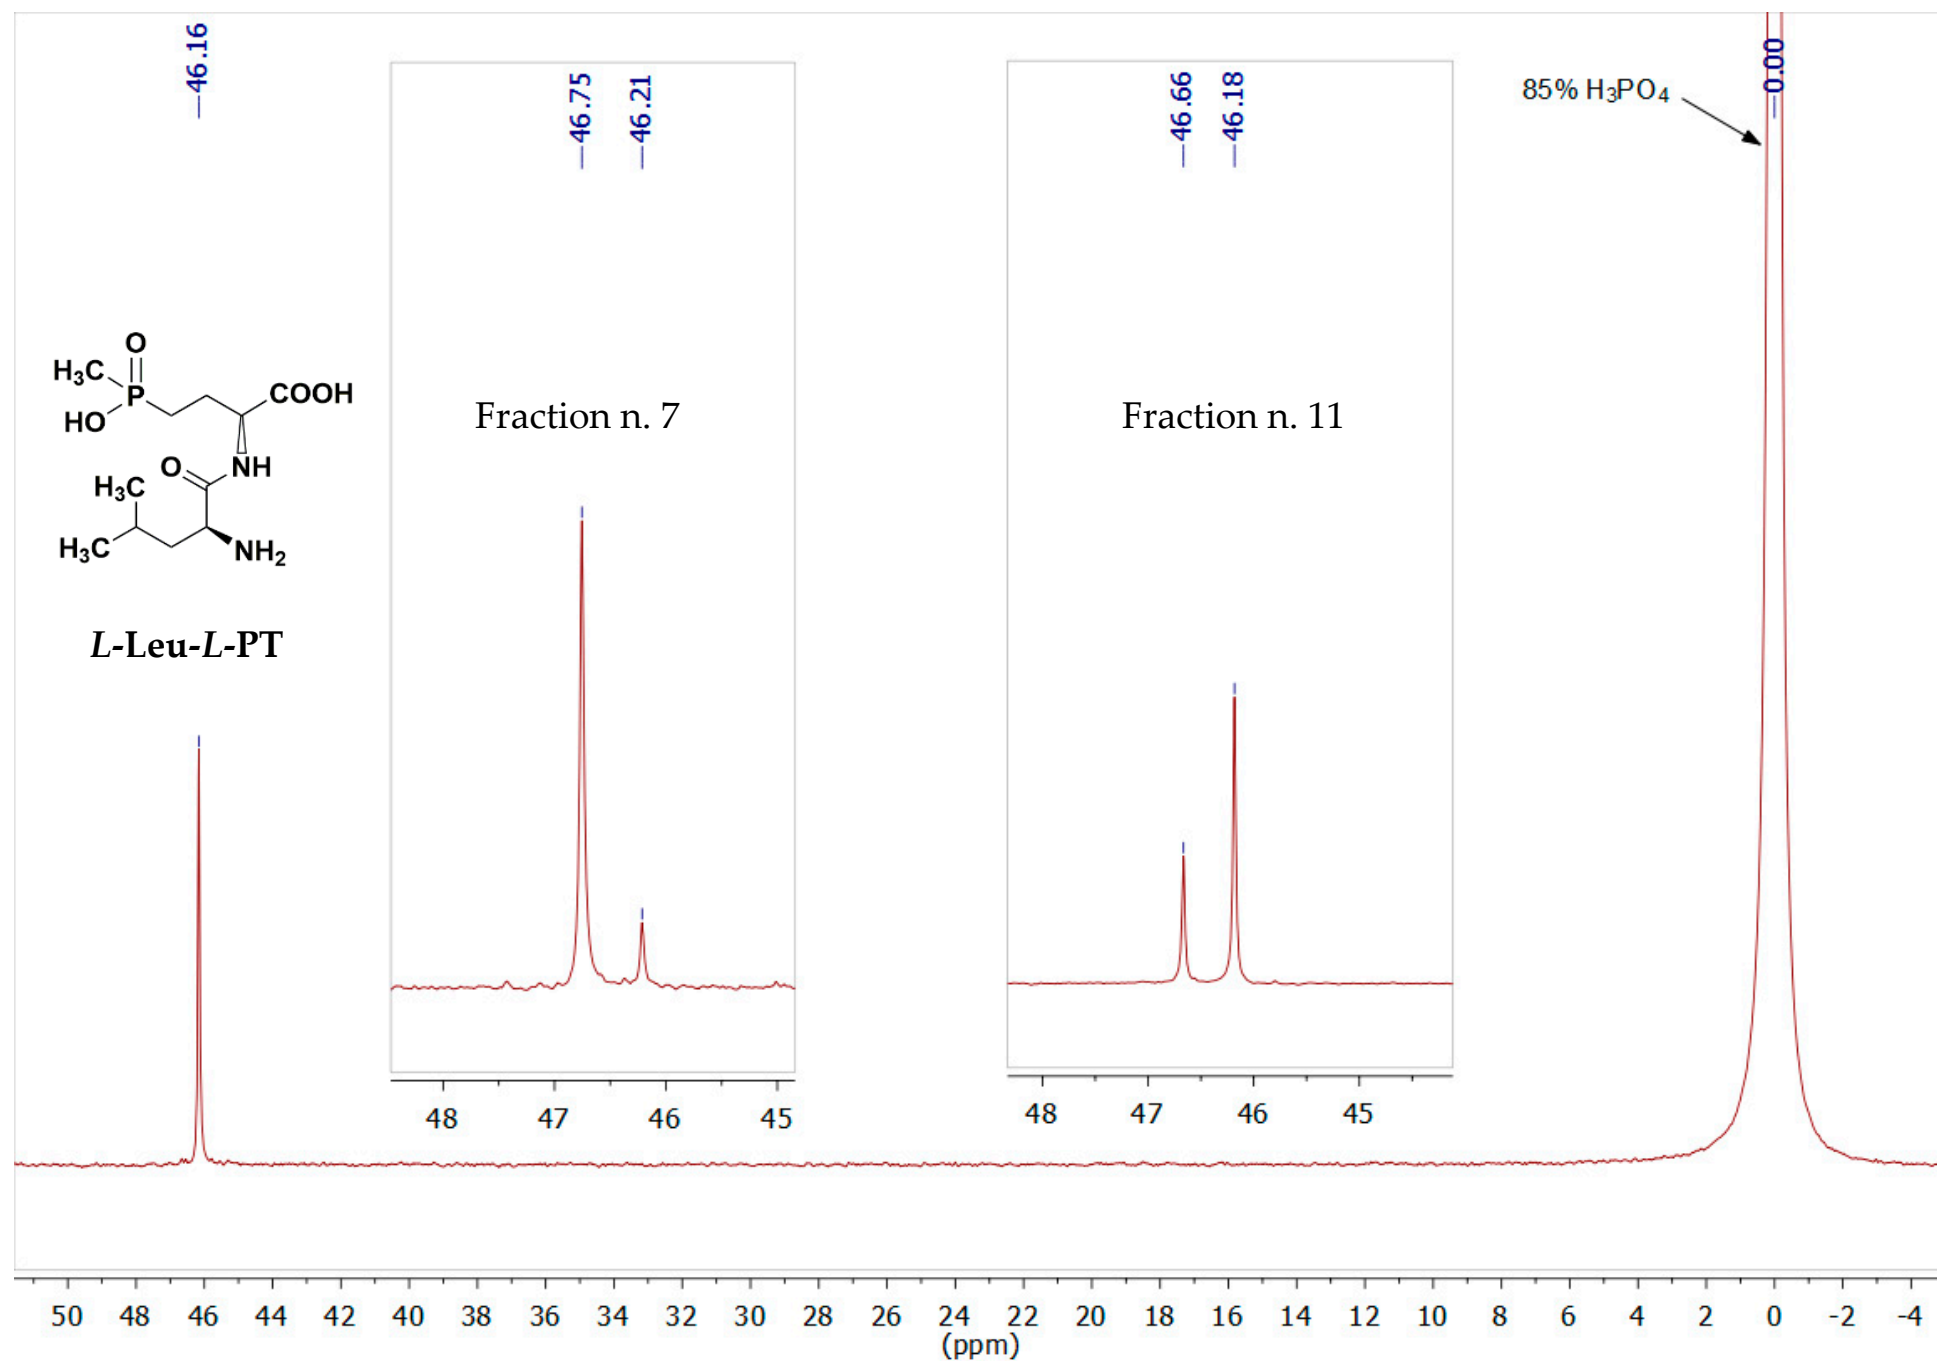

**Figure S8.** Combined  $^{31}\text{P}$ -NMR spectra of *L*-Leu-*L*-PT, *L*-Leu-*D*-PT with about 10% of *L*,*L*-diastereomer (fraction n. 7) and *L*-Leu-*rac*-PT (fraction 11).

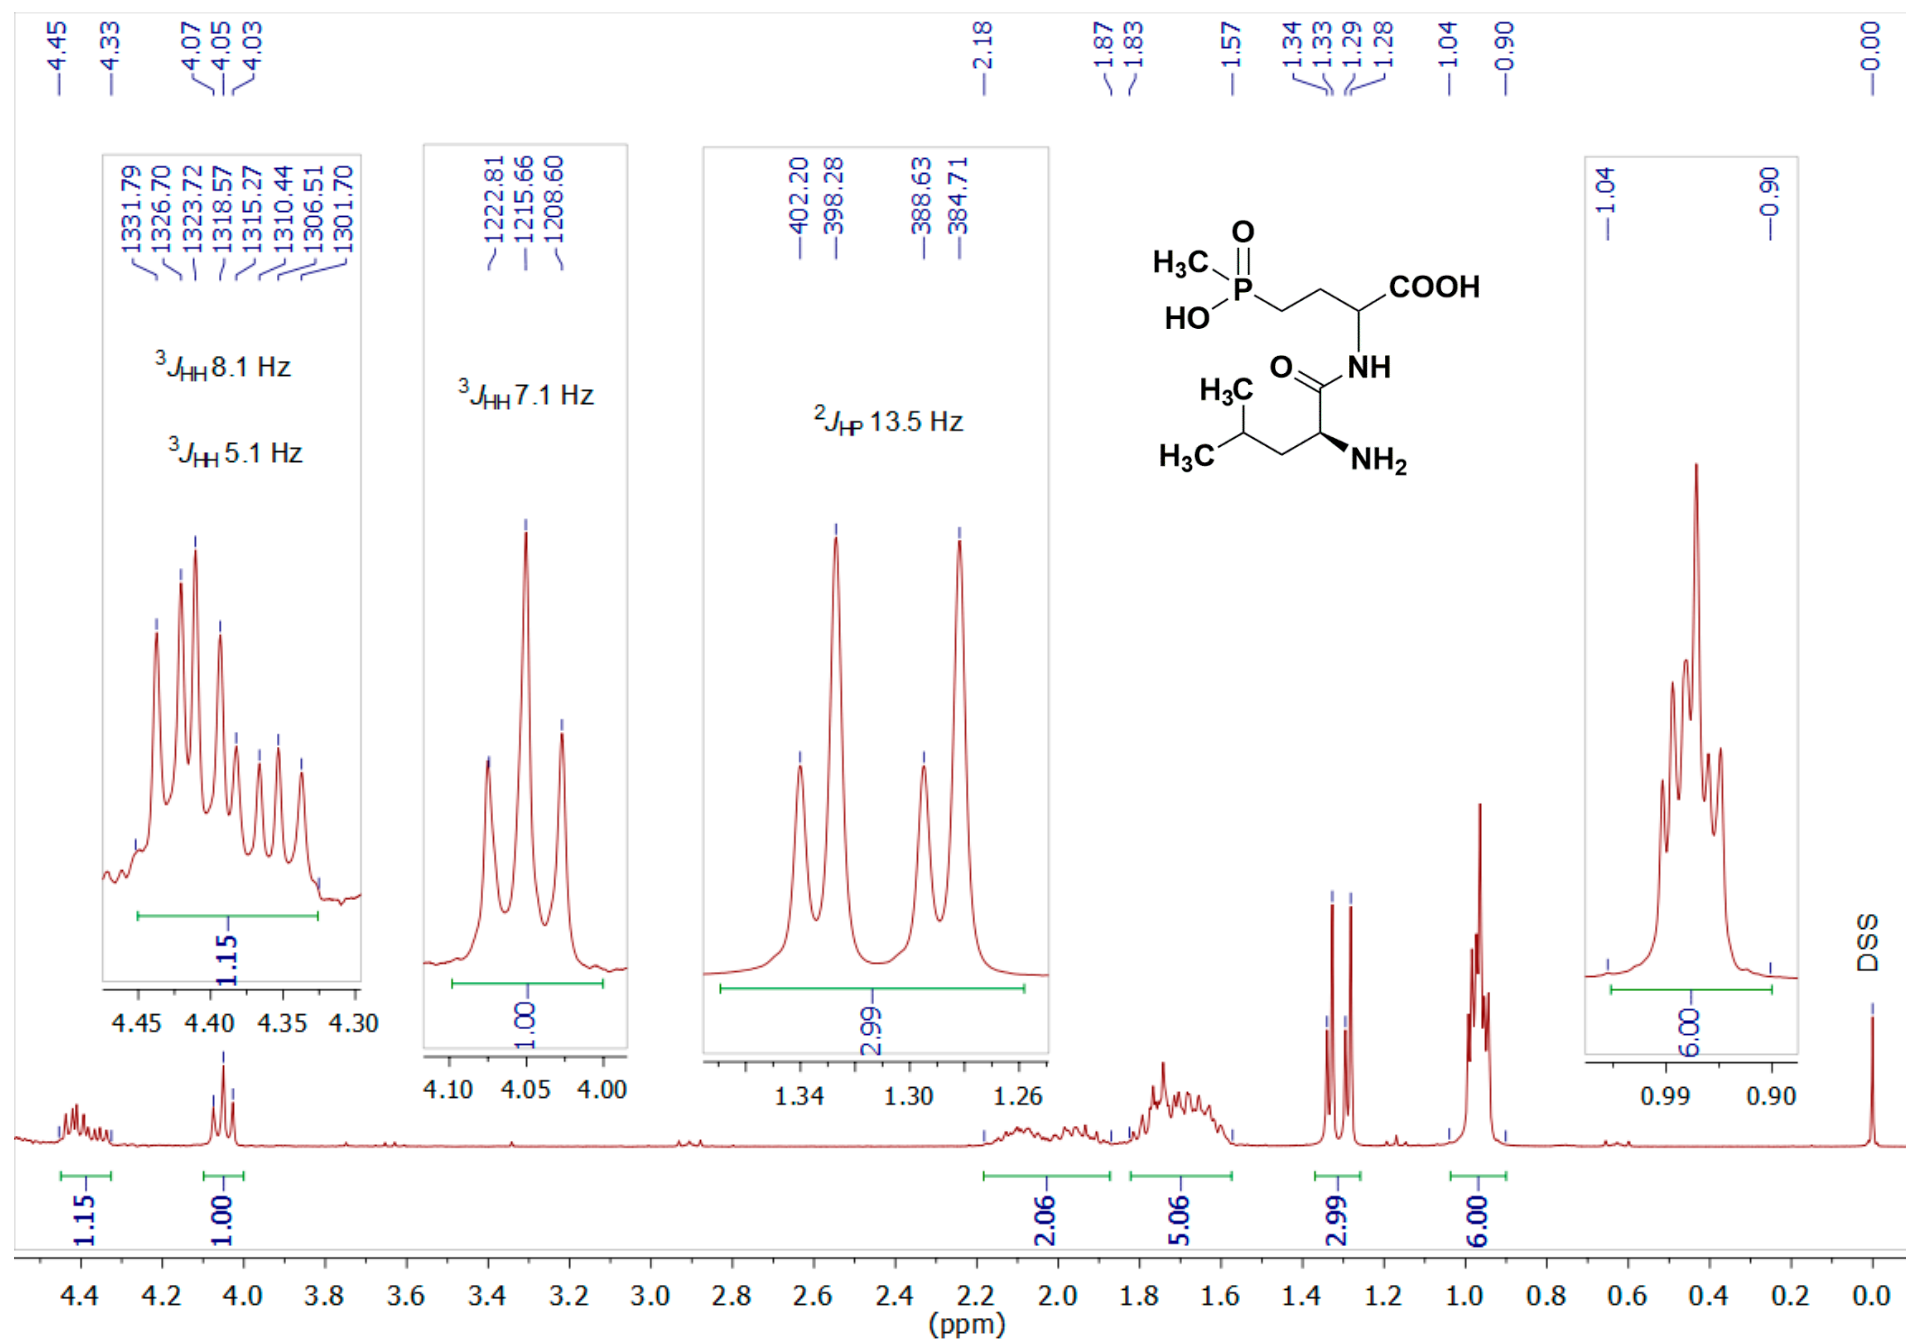

Figure S9.  $^1\text{H}$ -NMR spectrum of *L*-Leu-*rac*-PT (fraction n. 11).



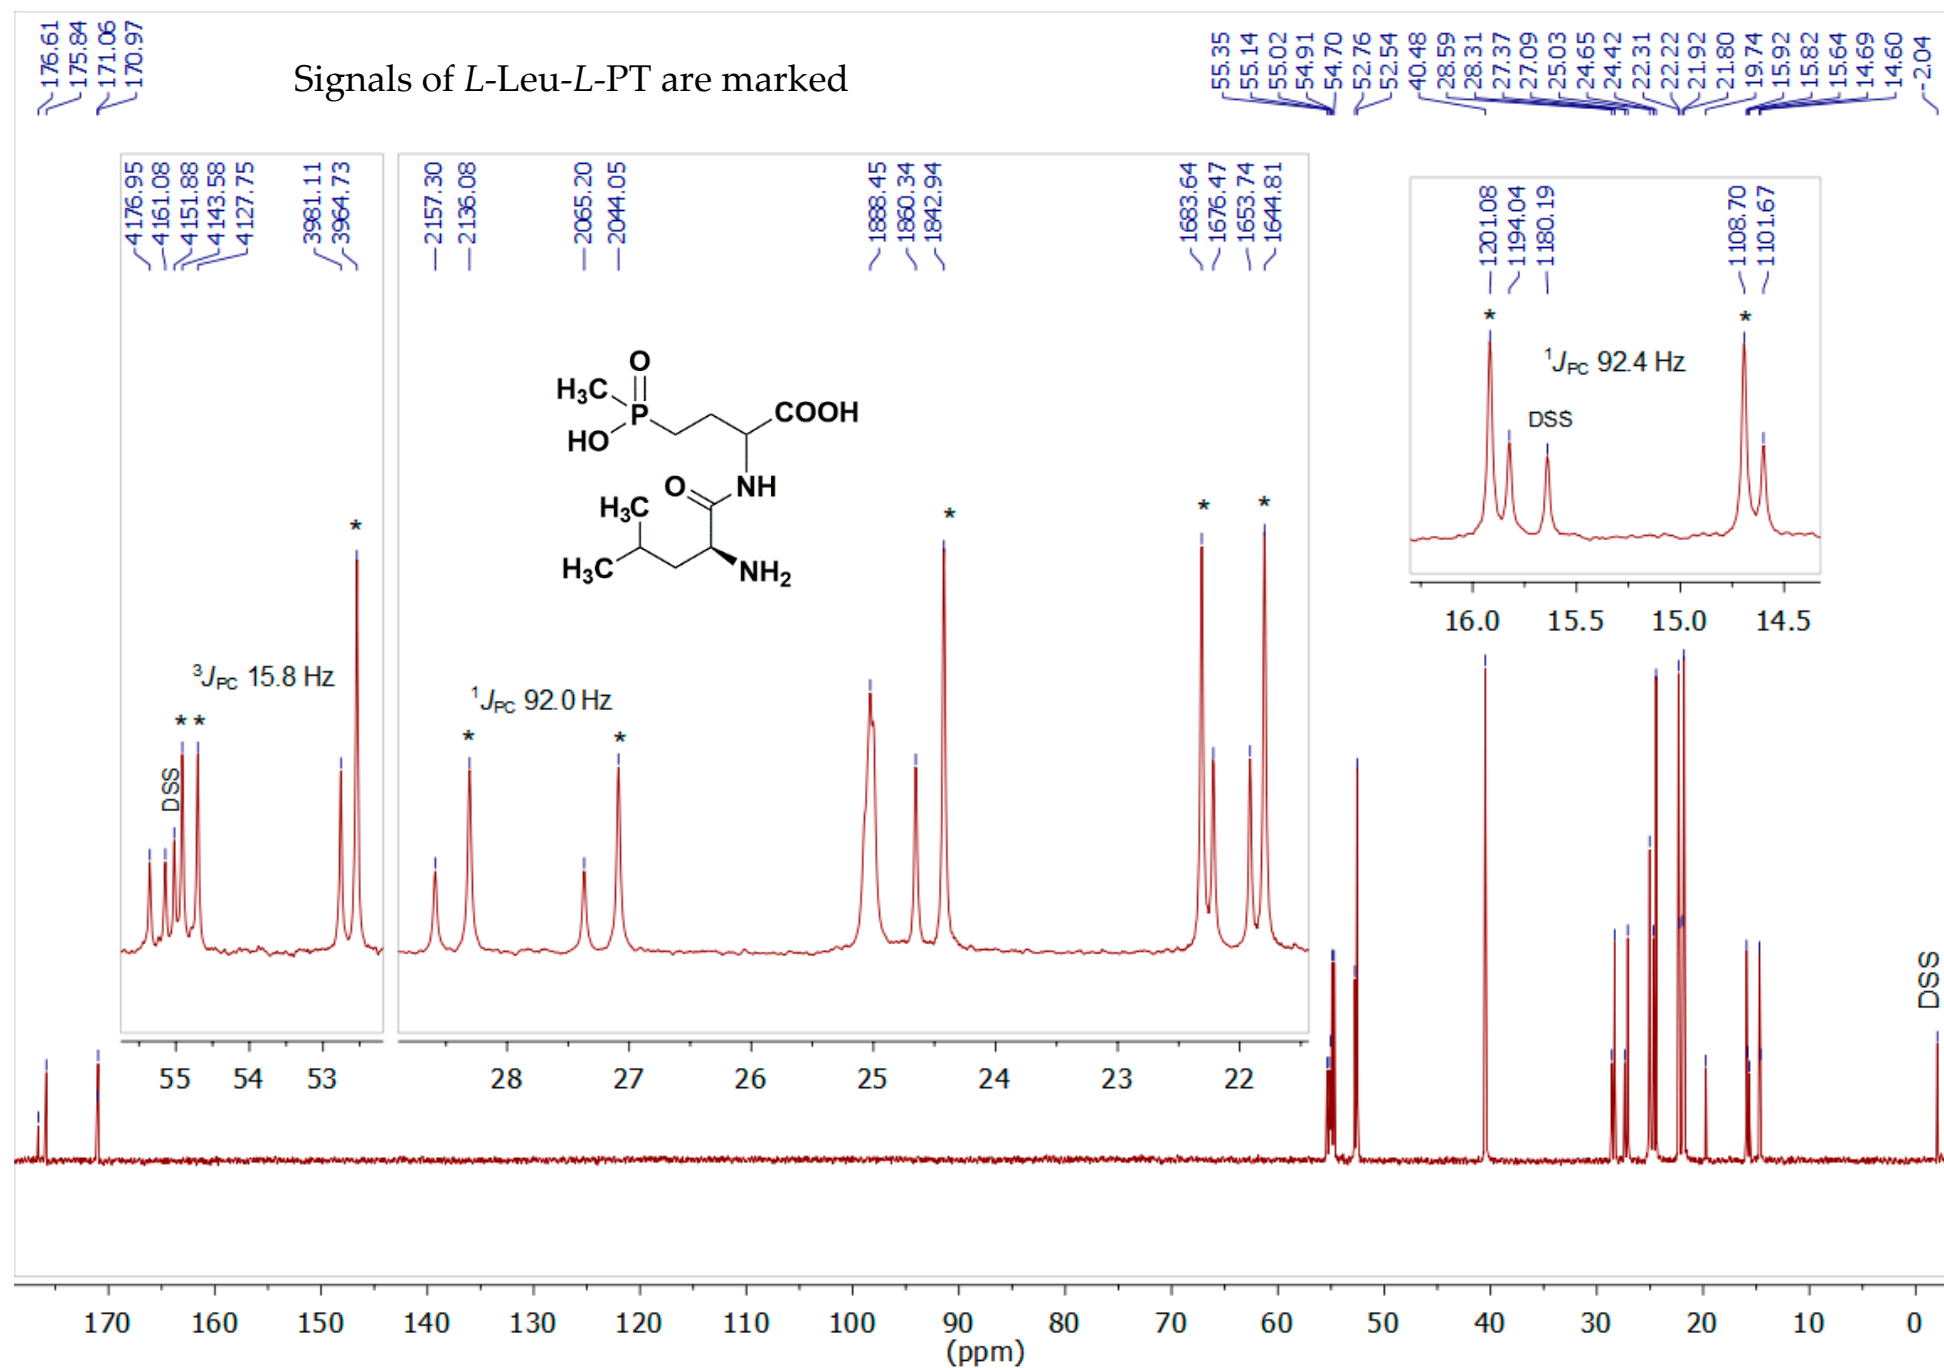

Figure S10.  $^{13}\text{C}$ -NMR spectrum of *L*-Leu-*rac*-PT (fraction n. 11).

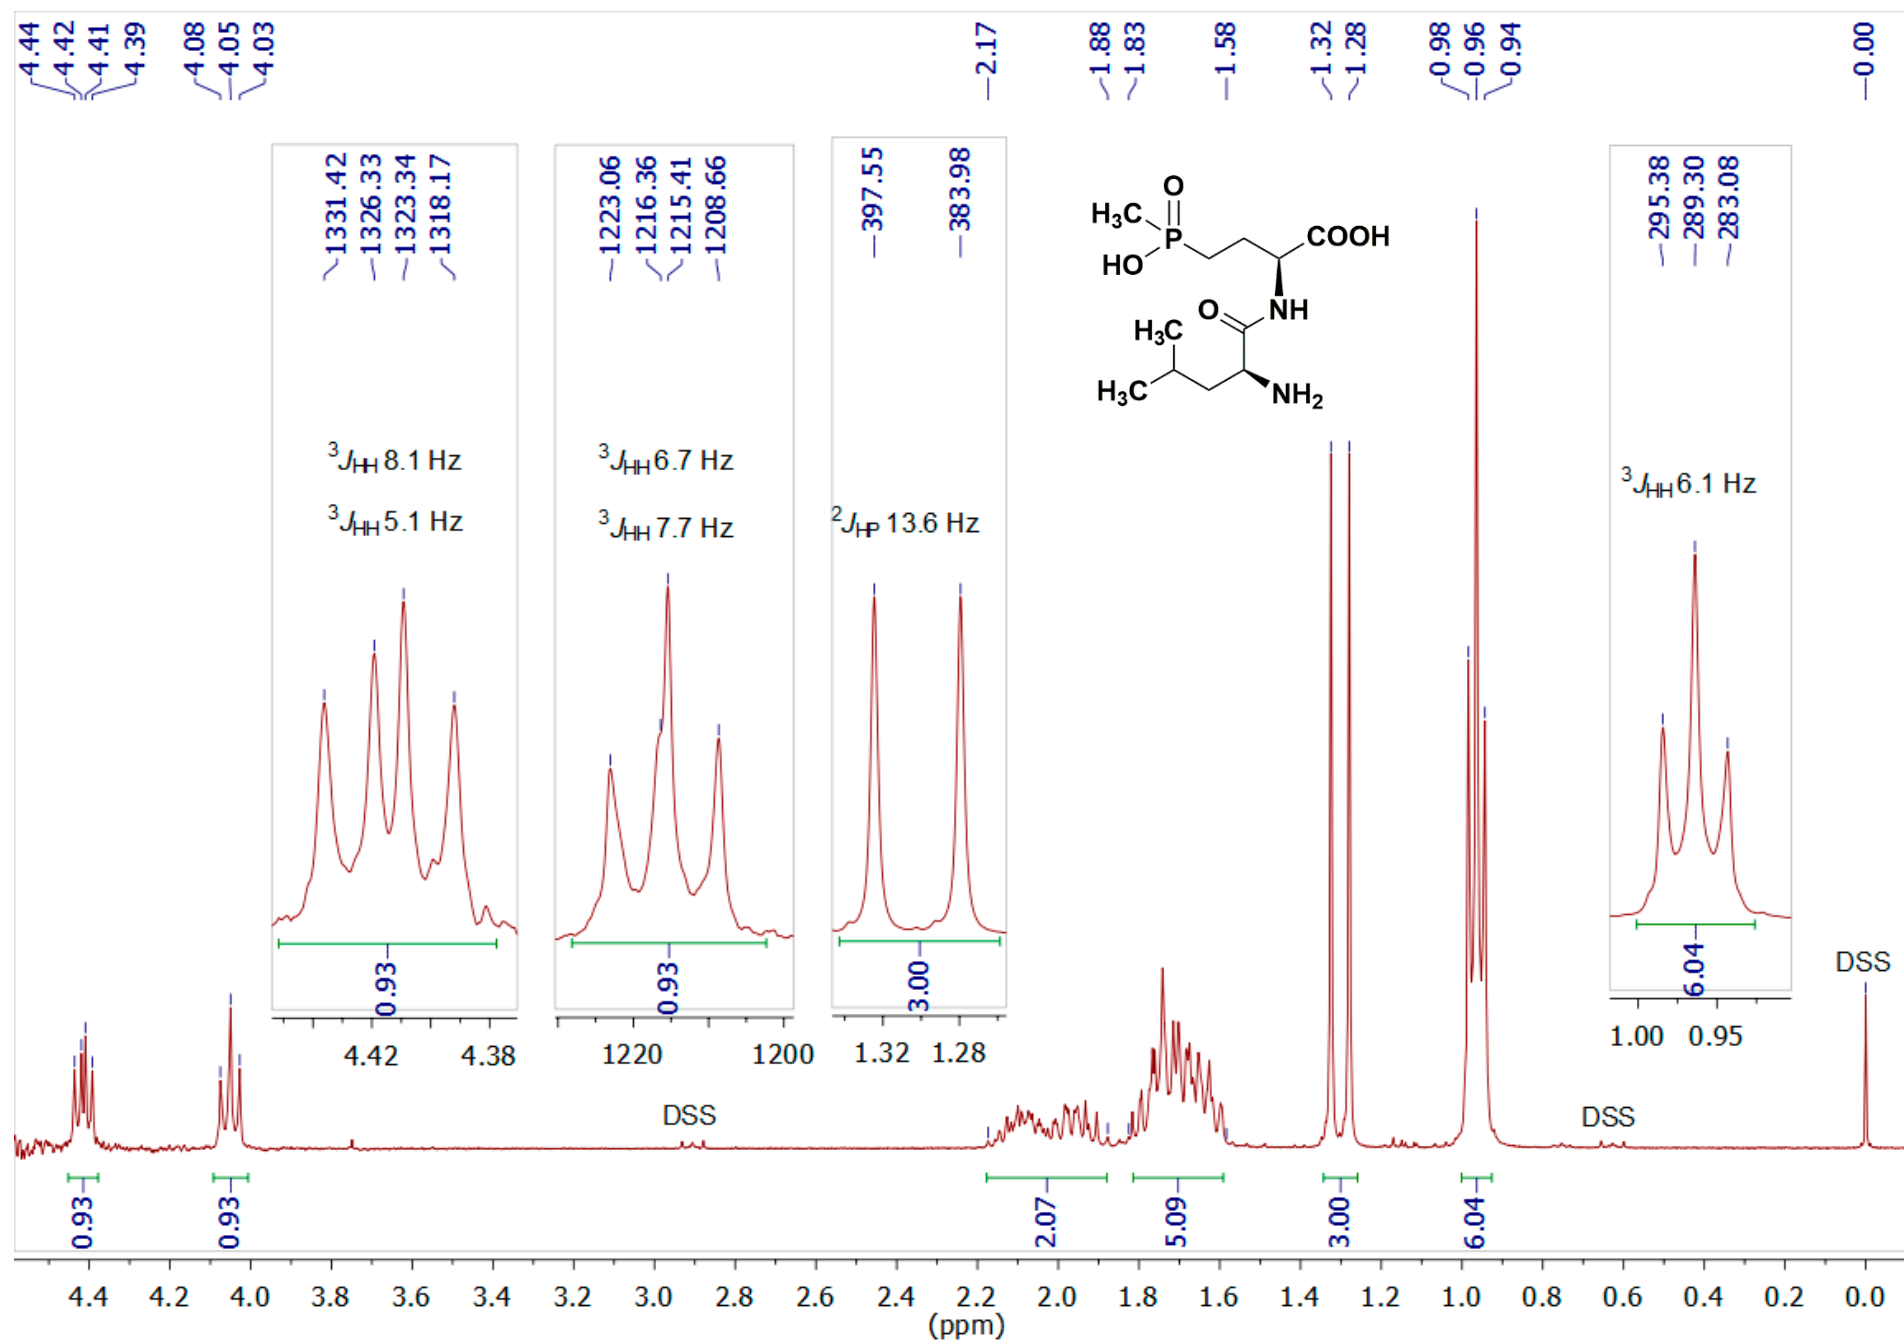

Figure S11. <sup>1</sup>H-NMR spectrum of L-Leu-L-PT.

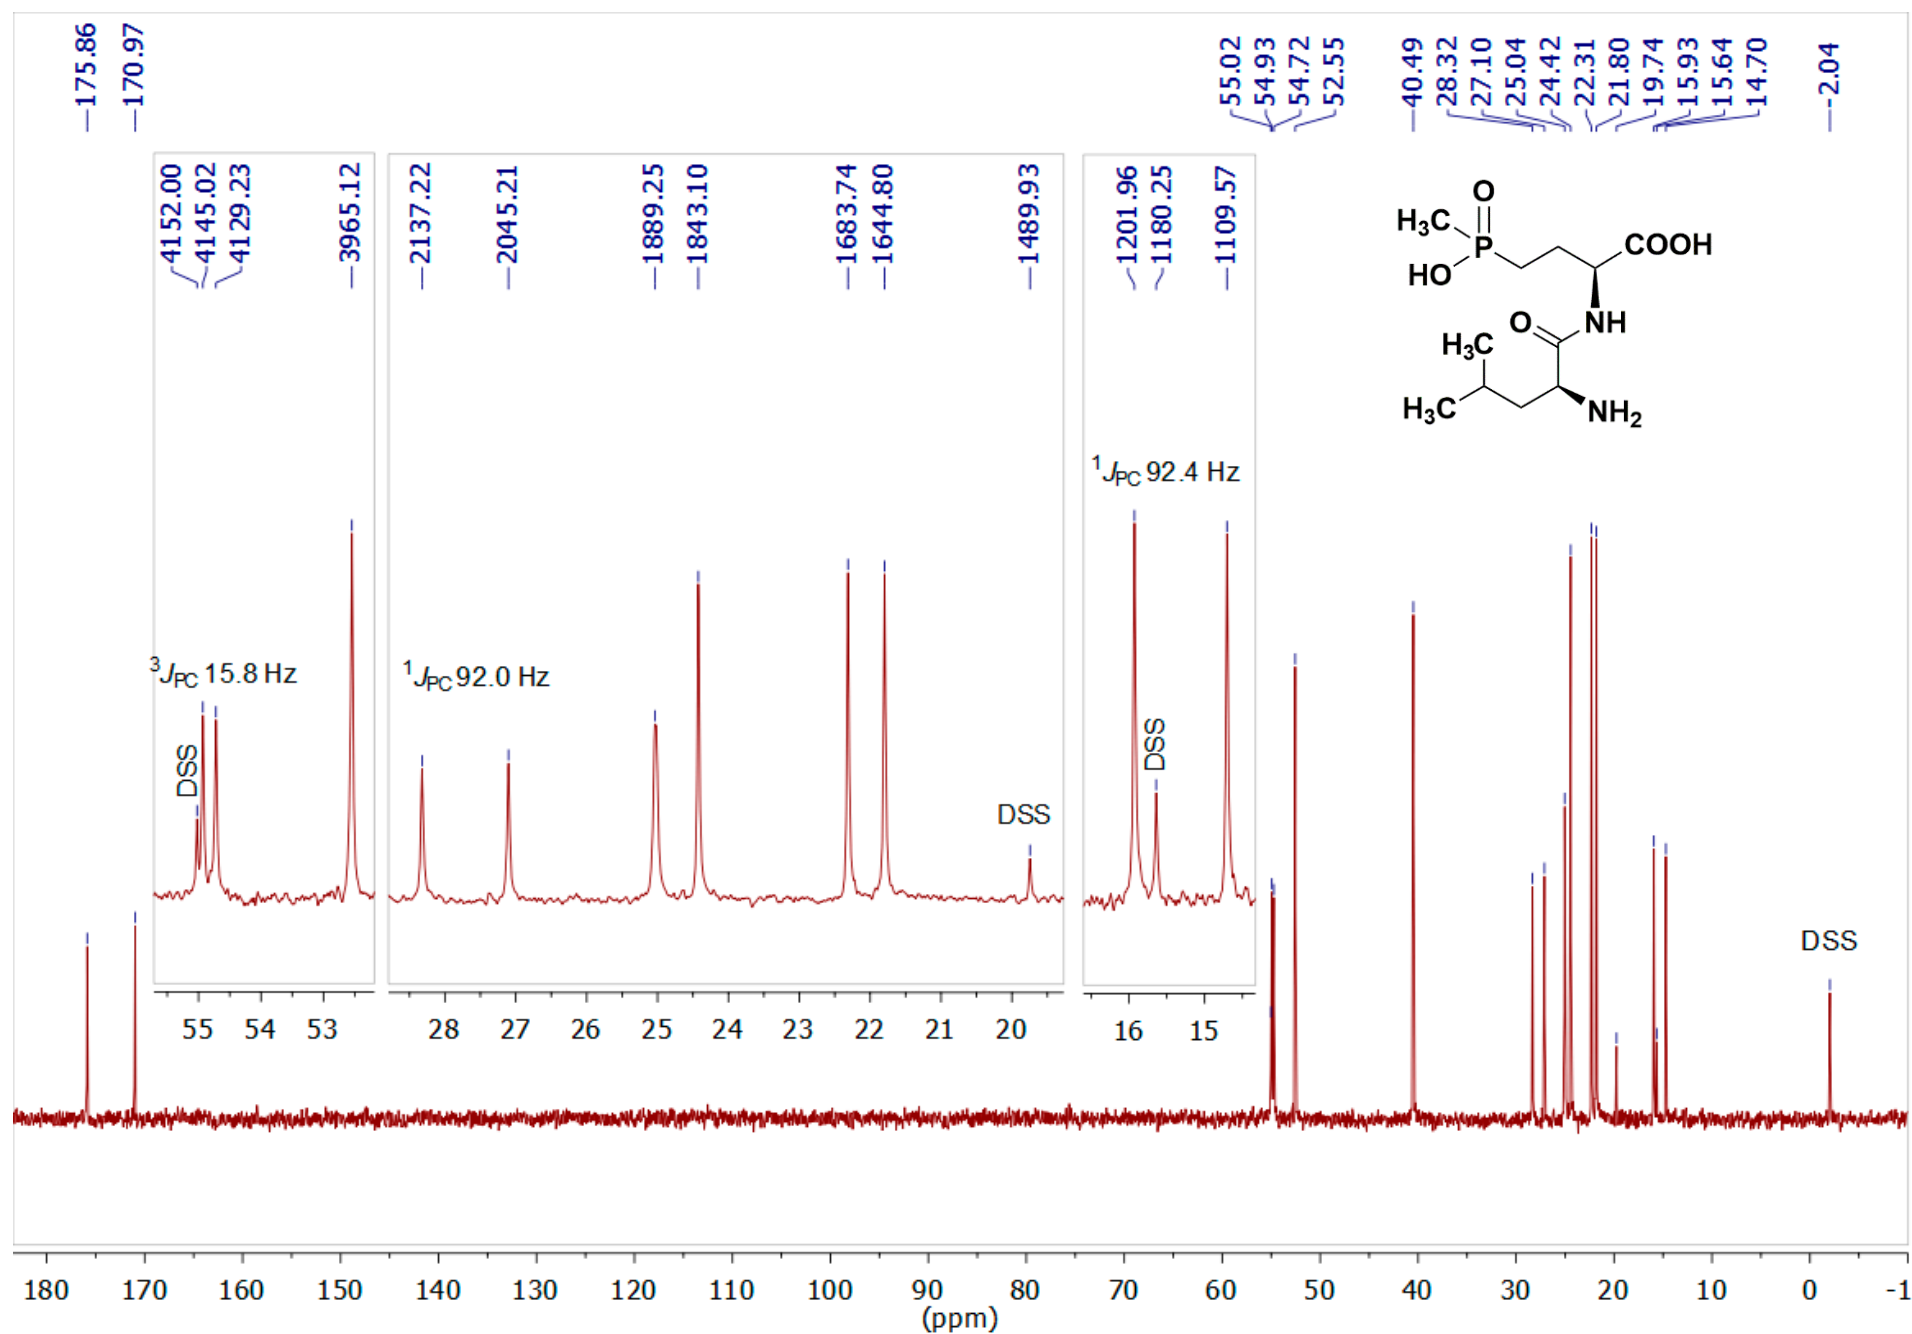

Figure S12.  $^{13}\text{C}$ -NMR spectrum of *L*-Leu-*L*-PT.
